# Supplementary material for: Band modification of graphene by using slow Cs+ ions
Source: Royal Society of Chemistry journal article supplement (doi:10.1039/c5ra24482j), 2016-01-01
Supplement: c5ra24482j1.pdf [file c5ra24482j1.pdf]

## Supplementary Information

**Sample Preparations;** We have grown a SLG on a 6H-SiC(0001) substrate (Cree Inc.) by annealing the sample at temperature 1250 °C.<sup>42,43</sup> We confirmed the formation of SLG first by observing the characteristic changes in the low-energy electron diffraction (LEED) pattern, and then more convincingly the presence of a well-defined linear Dirac band in the valence band together with the C 1s core level spectrum unique only to SLG. The annealing temperature ( $T_a$ ) was measured by using an optical pyrometer. Deposition of Cs<sup>+</sup> ions on graphene was made by using a low-energy alkali metal ion gun (Kimball Physics), and the ion beam current density measured from the sample was 1.7 nA cm<sup>-2</sup>. Considering the relatively low desorption temperature (200 K) of Cs atoms,<sup>40</sup> we have kept our sample at 150 K while depositing Cs<sup>+</sup> ions on graphene. We also have used a Cs getter source (SAES) to adsorb neutral Cs atoms on graphene, and the Cs coverage,  $\vartheta_{Cs}$ , was determined by using a quartz oscillator (0.2 Å min<sup>-1</sup>), which was cross-checked by measuring the intensity ratio ( $I_{Cs}/I_C$ ) of the main Cs 4d and C 1s core levels.

**Valence Band and Core Level Data;** Our ARPES and HRCLS data were obtained with the sample maintained at 85 K at the beamline 4A2 of the Pohang Accelerator Laboratory (PAL) in Korea using synchrotron photons of energy 34 eV and 510 eV, respectively. Our UHV chamber kept under  $1 \times 10^{-10}$  Torr during the measurements was equipped with an electron analyser (R4000, VG-Scienta) that provides an overall energy resolution of 40 meV. We have obtained STM images with the sample at room temperature by using a low-temperature STM (UNISOKU) under a base pressure of  $1 \times 10^{-10}$  Torr.

**DFT Calculations;** We have performed the first-principles calculations based on DFT implemented in Vienna Ab-initio Simulation Package to understand the changes in the  $\pi$ -band of graphene induced by Cs<sup>+</sup> ions.<sup>44</sup> We used the projector augmented wave pseudopotentials<sup>45</sup> as atomic potentials and the generalized gradient approximation (GGA) of Perdew, Burke and Enzelsch<sup>46</sup> to treat the exchange-correlation interaction of electrons. A kinetic energy cutoff of 420 eV was chosen for the expansion of the plane-wave basis set. Epitaxial graphene on SiC was emulated by  $2 \times 2$  graphene supercells on SiC substrate that consists of two SiC bilayers with a  $\sqrt{3} \times \sqrt{3}$  in-plane supercell and hydrogen termination at the bottom. The irreducible Brillouin zone integration was done by  $15 \times 15 \times 1$  k-point sampling and structural optimizations were done by minimizing the Hellmann-Feynman force on ions less than 0.01 eV Å<sup>-1</sup>. To adjust the error of GGA the van der Waals interactions, we employed the Tkatchenko-Scheffler correction method.<sup>47</sup>
